# Supplementary material for: A highly selective route to linear alpha olefins from biomass-derived lactones and unsaturated acids
Source: Royal Society of Chemistry journal article supplement (doi:10.1039/c3cc43587c), 2013-01-01
Supplement: c3cc43587c.pdf [file c3cc43587c.pdf]

## Supporting Information

### Methods and Materials

#### Catalyst preparation

$\gamma$ -Al<sub>2</sub>O<sub>3</sub> was obtained from STREM Chemicals and was pre-treated at 648 K in 60 cm<sup>3</sup> (STP) min<sup>-1</sup> helium (Airgas, industrial grade) for 3 hours before use. Amorphous SiO<sub>2</sub>-Al<sub>2</sub>O<sub>3</sub> was obtained from Grace Davison (SIAL 3113, Si/Al=3.40) and was pre-treated at 723 K in 100 cm<sup>3</sup> (STP) min<sup>-1</sup> air (Airgas, industrial grade) for 2 hours before use.

The tungstated alumina catalysts were prepared by incipient wetness impregnation of  $\gamma$ -Al<sub>2</sub>O<sub>3</sub> with an aqueous solution of ammonium metatungstate (Sigma-Aldrich, 99.99% trace metals basis). After impregnation, the material was dried at 383 K overnight followed by calcination at 723 K for 5 hours in static air. Before reaction studies, the catalysts were further pre-treated at 648 K in 60 cm<sup>3</sup> (STP) min<sup>-1</sup> helium (Airgas, industrial grade) for 3 hours. Catalyst containing 4 wt% WO<sub>3</sub> (calculated value) is denoted as 4W-Al.

The Magnesium Oxide (MgO) catalyst was obtained from NanoScale Materials, Inc. and was activated at 500K under 60 cm<sup>3</sup> (STP) min<sup>-1</sup> helium (Airgas, industrial grade) for 3 hours before reaction studies.

#### Catalytic activity measurements

Reaction studies were conducted in 6.4 mm (0.25 inch, wall thickness = 0.028 inch) outer diameter stainless steel tube. The reactor was packed with 100mg ~ 2g of catalyst diluted with fine fused silica powder (Sigma-Aldrich). Two quartz wool plugs were used to seal both ends of the reactor. The reactor was heated by an insulated furnace (Applied Test Systems Series 3210), and temperature was monitored using a K type thermocouple (Omega) and was controlled with a PID temperature controller (Love Controls, Series 16A). An HPLC pump (Lab Alliance) was used to deliver aqueous  $\gamma$ -valerolactone solution to the reactor. For  $\gamma$ -octalactone and  $\gamma$ -undecalactone study, two syringe pumps were used to deliver water and lactone to the reactor due to the low solubility of  $\gamma$ -octalactone and  $\gamma$ -undecalactone in water. In the 1-butene isomerization study, 1-butene (Airgas, 5% in helium) was diluted with helium to obtain the targeted partial pressure needed in the feed. Gas flow was regulated using a mass flow controller (Brooks 5850 model), and the system pressure was maintained at 1 bar. The effluent liquid was collected in a gas-liquid separator maintained at room temperature and was drained periodically for analysis by HPLC or GC. The effluent gas was analyzed by two online GCs equipped with an FID (Shimadzu, 2010) detector and a TCD detector (Shimadzu GC-8A), respectively. Products were identified using a gas chromatograph/mass spectrometer system (Shimadzu GCQP-2010) and quantifications were performed using a gas chromatograph (Shimadzu GC-2010) equipped with an FID. Yields and conversions were defined as:

$$\text{Conversion} = \frac{\text{moles of lactones converted}}{\text{moles of lactones fed}}$$

$$\text{Selectivity} = \frac{\text{moles of product}}{\text{moles of lactones converted}}$$

$$\text{Yield} = \frac{\text{moles of product}}{\text{moles of lactones fed}}$$

### Temperature-programmed desorption

Temperature-programmed desorption of NH<sub>3</sub> or CO<sub>2</sub> was used to determine the total acid site density or total basic site density, respectively. 100-200 mg of catalyst was loaded in a glass flow-through cell. Before NH<sub>3</sub> or CO<sub>2</sub> adsorption, samples were treated at 648 K for 1 h under flowing helium (120 cm<sup>3</sup> (STP) min<sup>-1</sup>) to remove adsorbed moisture. In the case of NH<sub>3</sub> adsorption, 1 mol% NH<sub>3</sub> in He (Airgas, 100 cm<sup>3</sup> (STP) min<sup>-1</sup>) was then passed through the sample at 423 K for ca. 45 min. Physisorbed NH<sub>3</sub> was removed by holding the sample at 423 K under flow helium (120 cm<sup>3</sup> (STP) min<sup>-1</sup>) for 45 min. In the case of CO<sub>2</sub> adsorption, 10 mol% CO<sub>2</sub> in He (Airgas, 100 cm<sup>3</sup> (STP) min<sup>-1</sup>) was then passed through the sample at 298K for ca. 45 min. Physisorbed CO<sub>2</sub> was removed by holding the sample at 298 K under flow helium (120 cm<sup>3</sup> (STP) min<sup>-1</sup>) for 45 min. Temperature-programmed desorption was performed using a temperature ramp of 10 K min<sup>-1</sup> from room temperature to 1073 K under flowing He (50 cm<sup>3</sup> (STP) min<sup>-1</sup>). The desorbed NH<sub>3</sub> or CO<sub>2</sub> was quantified by an online mass spectrometer (OmniStar).

### N<sub>2</sub> adsorption

Nitrogen adsorption-desorption isotherms were measured at 77 K using a Micromeritics ASAP 2020 analyzer. The samples were degassed at 423K for 5 hours prior to analysis. The specific surface areas of the materials were determined using the Brunauer-Emmett-Teller (BET) approach. The surface areas of catalysts used in this study are presented in Table S1.

**Table S1.** Surface area of catalysts used in this study

| Catalyst                                         | Surface Area (m <sup>2</sup> /g) |
|--------------------------------------------------|----------------------------------|
| SiO <sub>2</sub> /Al <sub>2</sub> O <sub>3</sub> | 450                              |
| γ-Al <sub>2</sub> O <sub>3</sub>                 | 200                              |
| 4W-Al                                            | 195                              |
| 8W-Al                                            | 193                              |
| 20W-Al                                           | 188                              |
| MgO                                              | 78                               |

### Thermogravimetric analysis (TGA)

Thermogravimetric Analysis (TGA) was carried out using a Thermogravimetric Analyzer Q500 in oxygen atmosphere ( $50 \text{ cm}^3 \text{ (STP) min}^{-1}$ ) with a rate of  $20 \text{ K min}^{-1}$  to  $973 \text{ K}$ . The temperature was maintained at  $973 \text{ K}$  for 10 minutes for each experiment. Approximately 42 mg of sample was used in each experiment.

### FTIR spectroscopy of adsorbed pyridine

The ratio of Brønsted and Lewis acid sites on the solid acid catalysts studied was determined from infrared spectroscopic measurements of adsorbed pyridine. Approximately 10 mg of catalyst was placed in a 1.2 cm die and pressed into a self-supporting wafer, which was placed in a treatment/sampling cell where it was heated to  $648 \text{ K}$  under flowing dry helium (Airgas, industrial grade) for 2 h. A reference spectrum of the catalyst was then taken. Pyridine was introduced into the cell through a bubbler for 30 min at room temperature, followed by purging under flowing helium for 1 h before another spectrum was taken. The areas of the pyridine peaks at  $1455$ , and  $1540 \text{ cm}^{-1}$ , assigned to Lewis and Brønsted acid sites, respectively,<sup>[1]</sup> were determined by subtracting the spectra of the sample before and after pyridine exposure. The Brønsted/Lewis acid ratios were obtained by normalizing the areas with integrated molar extinction coefficients reported in the literature:  $1.67 \text{ cm} \mu\text{mol}^{-1}$  for Brønsted sites and  $2.22 \text{ cm} \mu\text{mol}^{-1}$  for Lewis sites.<sup>[1]</sup>

[1] C. A. Emeis, *J. Catal.* **1993**, *141*, 347-354.
